# Supplementary material for: DJ-1 (Park7) affects the gut microbiome, metabolites and the development of innate lymphoid cells (ILCs)
Source: PubMed Central journal article supplement (PMC7528091; doi:10.1038/s41598-020-72903-w), 2020-09-30
Supplement: 41598_2020_72903_MOESM1_ESM.pdf [file 41598_2020_72903_MOESM1_ESM.pdf]

1 **DJ-1 (Park7) affects the gut microbiome, metabolites and the development of Innate**  
2 **Lymphoid cells (ILCs)**  
3

4 Yogesh Singh<sup>1,4\*</sup>, Christoph Trautwein<sup>2</sup>, Achal Dhariwal<sup>3</sup>, Madhuri S Salker<sup>4</sup>, Md Alauddin<sup>4</sup>,  
5 Laimdota Zizmare<sup>2</sup>, Lisann Pelzl<sup>5,6</sup>, Martina Feger<sup>7</sup>, Jakob Admard<sup>1</sup>, Nicolas Casadei<sup>1</sup>, Michael  
6 Föller<sup>7</sup>, Vivek Pachauri<sup>8</sup>, David S Park<sup>9</sup>, Tak W Mak<sup>10</sup>, Julia-Stefanie Frick<sup>11</sup>, Diethelm  
7 Wallwiener<sup>4</sup>, Sara Y Brucker<sup>4</sup>, Florian Lang<sup>5#</sup>, Olaf Riess<sup>1#</sup>  
8

9 \*Address for correspondence

10  
11 Yogesh Singh, PhD  
12 Institute of Medical Genetics and Applied Genomics,  
13 Calwerstraße 7,  
14 University of Tübingen,  
15 72076, Tübingen, Germany  
16 Phone: +49 7071 29 72287  
17 Fax: +49 7071 29 25098  
18 Email: [ysinghbt@gmail.com](mailto:ysinghbt@gmail.com)/[yogesh.singh@med.uni-tuebingen.de](mailto:yogesh.singh@med.uni-tuebingen.de)  
19

20 **Short title:** DJ-1 deficiency leads to gut dysbiosis  
21

22 **Suppl. Fig. legends**  
23

24 **Suppl. Fig. 1:** Species and functional pathway analysis.

25 (a) Clustering of all bacteria at species level. (b) Significant increase in *Rikenella sp.* and  
26 *Alistipes timonensis* in DJ-1<sup>-/-</sup> mice compared with DJ-1<sup>+/+</sup>. Bar diagram (mean±SD) shows all  
27 the significantly different bacteria at species level in DJ-1<sup>+/+</sup> and DJ-1<sup>-/-</sup> mice. \*represents the  
28 p value of <0.05 using Student's unpaired t-test.  
29

30 **Suppl. Fig. 2:** KEGG functional gene pathway analysis from 16S rRNA.  
31

32 **Suppl. Fig. 3:** Inflammatory cytokine production in the feces of DJ-1<sup>-/-</sup> and DJ-1<sup>+/+</sup> mice.  
33

34 **Suppl. Fig. 4:** α-Syn and GFAP expression by IHC and Immunoblotting. (a) A representative  
35 IHCs colon pictures from DJ-1<sup>+/+</sup> (n=3) and DJ-1<sup>-/-</sup> (n=3) mice. Each mouse is shown and  
36 marked with #1, #2 and #3 and staining of α-Syn is shown with arrow heads in the pictures.  
37 (b) Bar diagram (mean±SEM) data shows similar expression in DJ-1<sup>+/+</sup> (n=5) and DJ-1<sup>-/-</sup> (n=5).  
38 (c) GFAP expression (green), nuclei (blue) in the colon as demonstrated by  
39 immunofluorescence staining.  
40

41 **Suppl. Fig. 5:** NMR Metabolites Heatmap and metabolites clustering in DJ-1<sup>+/+</sup> and DJ-1<sup>-/-</sup>  
42 feces.  
43

44 **Suppl. Fig. 6:** Example of <sup>1</sup>H-NMR spectra of DJ-1 and recorded reference standard spectrum  
45 for 3-HPPA  
46

47 **Suppl. Fig. 7:** Original Immunoblots used in the figures. (A) GFAP and corresponding Gapdh.  
48 (B) α-Syn (mouse) and corresponding Gapdh.  
49

50 **Suppl. Table 1:** Differentially expressed genes (DEGs) in DJ-1<sup>-/-</sup> mice mid brain containing  
51 *SNpc*.  
52

53 **Suppl. Table 2:** Ingenuity canonical pathways in DJ-1<sup>-/-</sup> mice mid brain containing *SNpc*.  
54  
55  
56

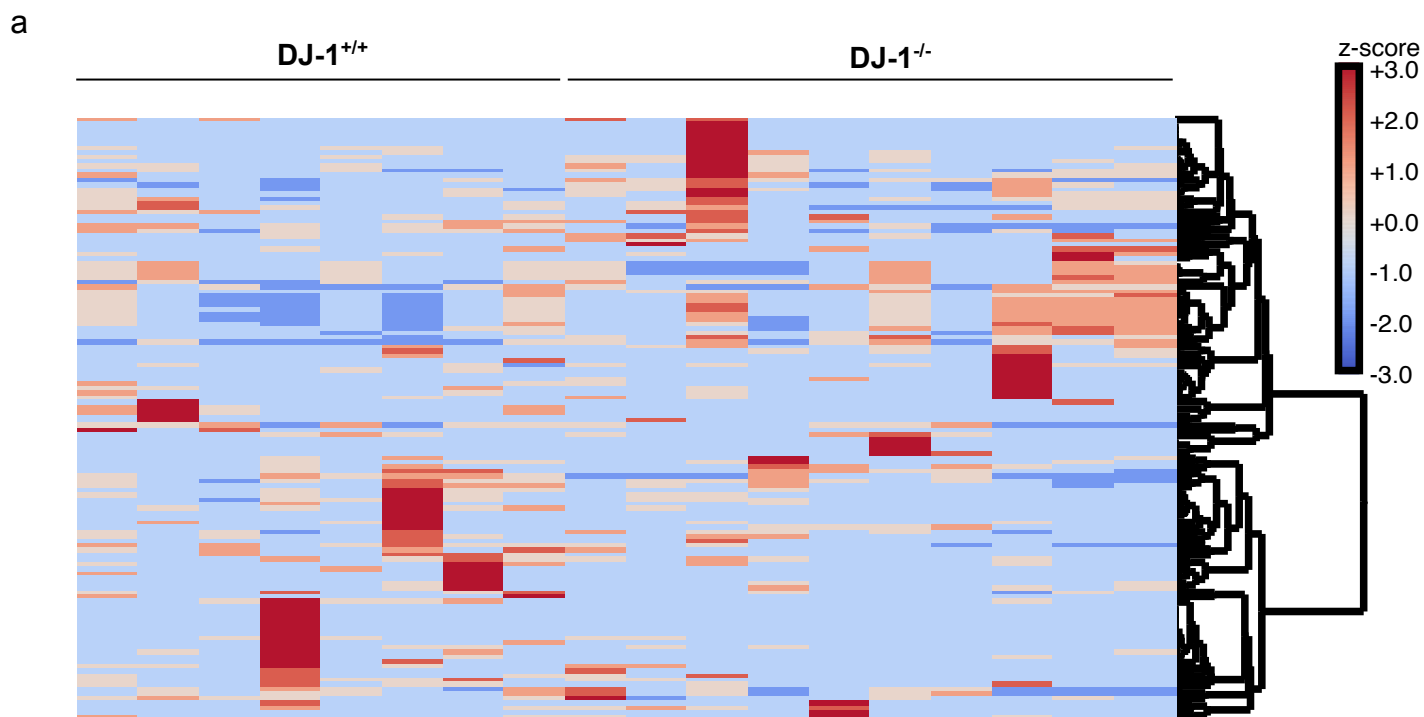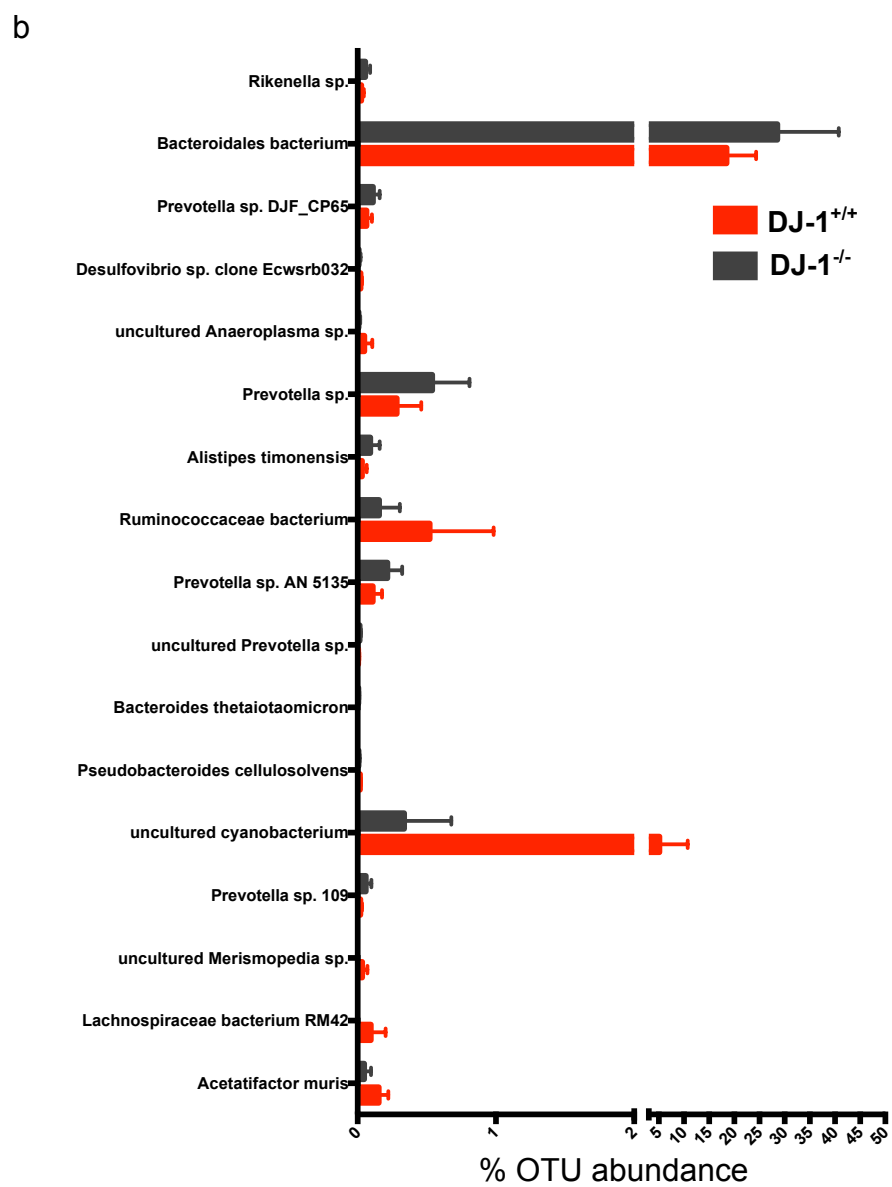

Suppl. Fig. 1

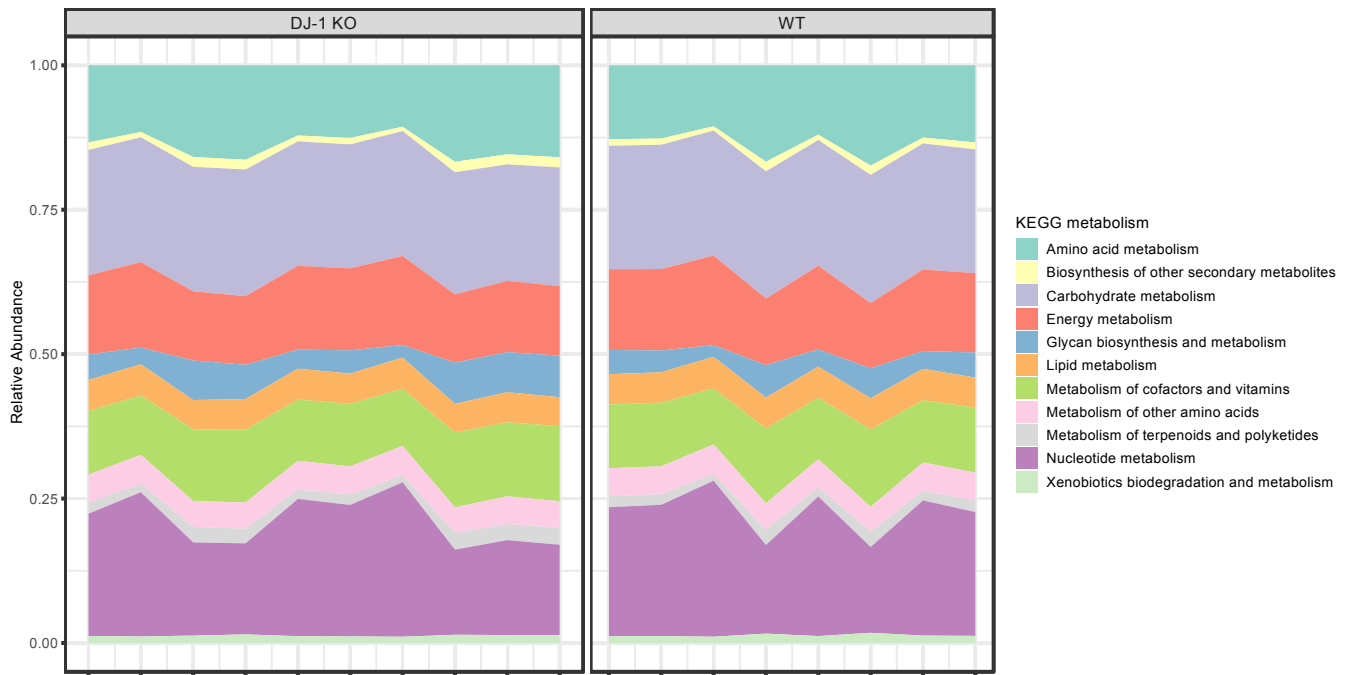

Suppl. Fig. 2

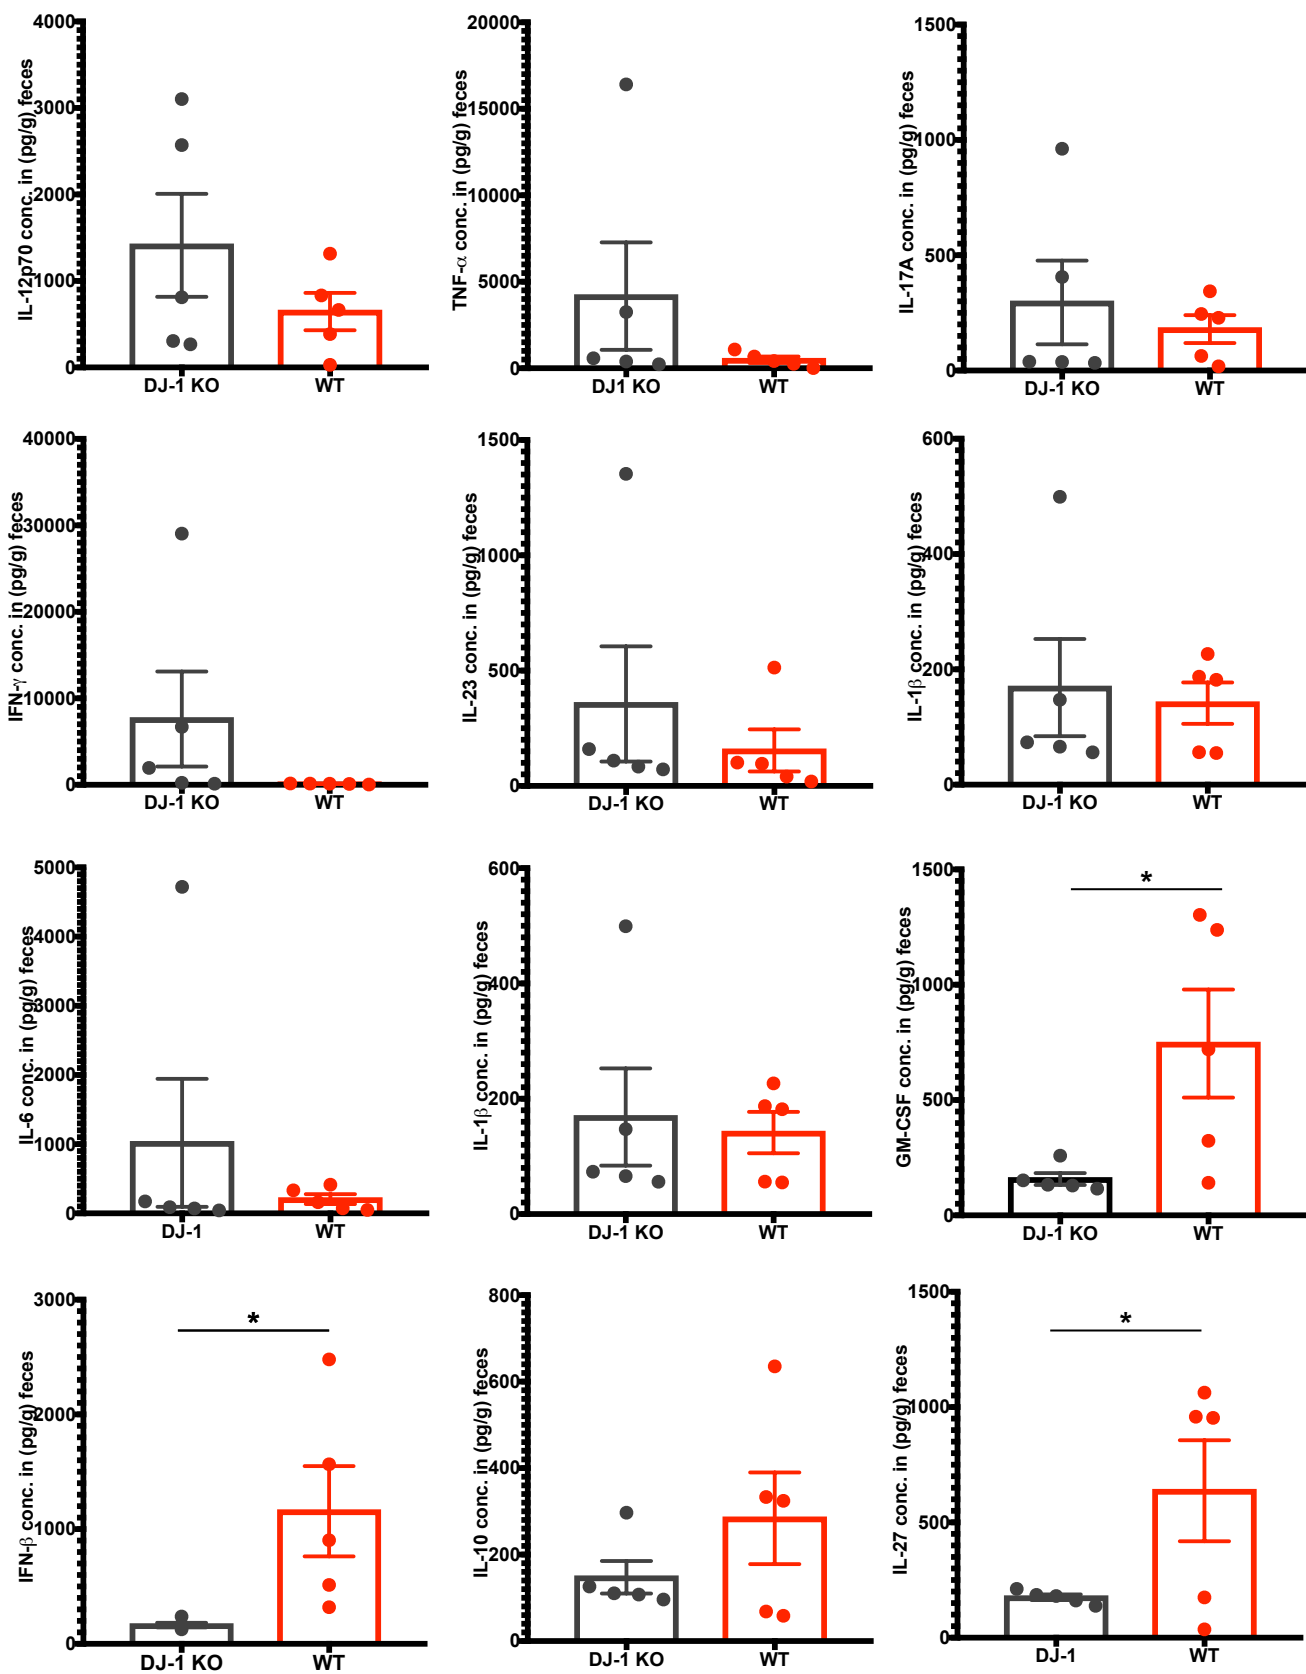

Suppl. Fig. 3

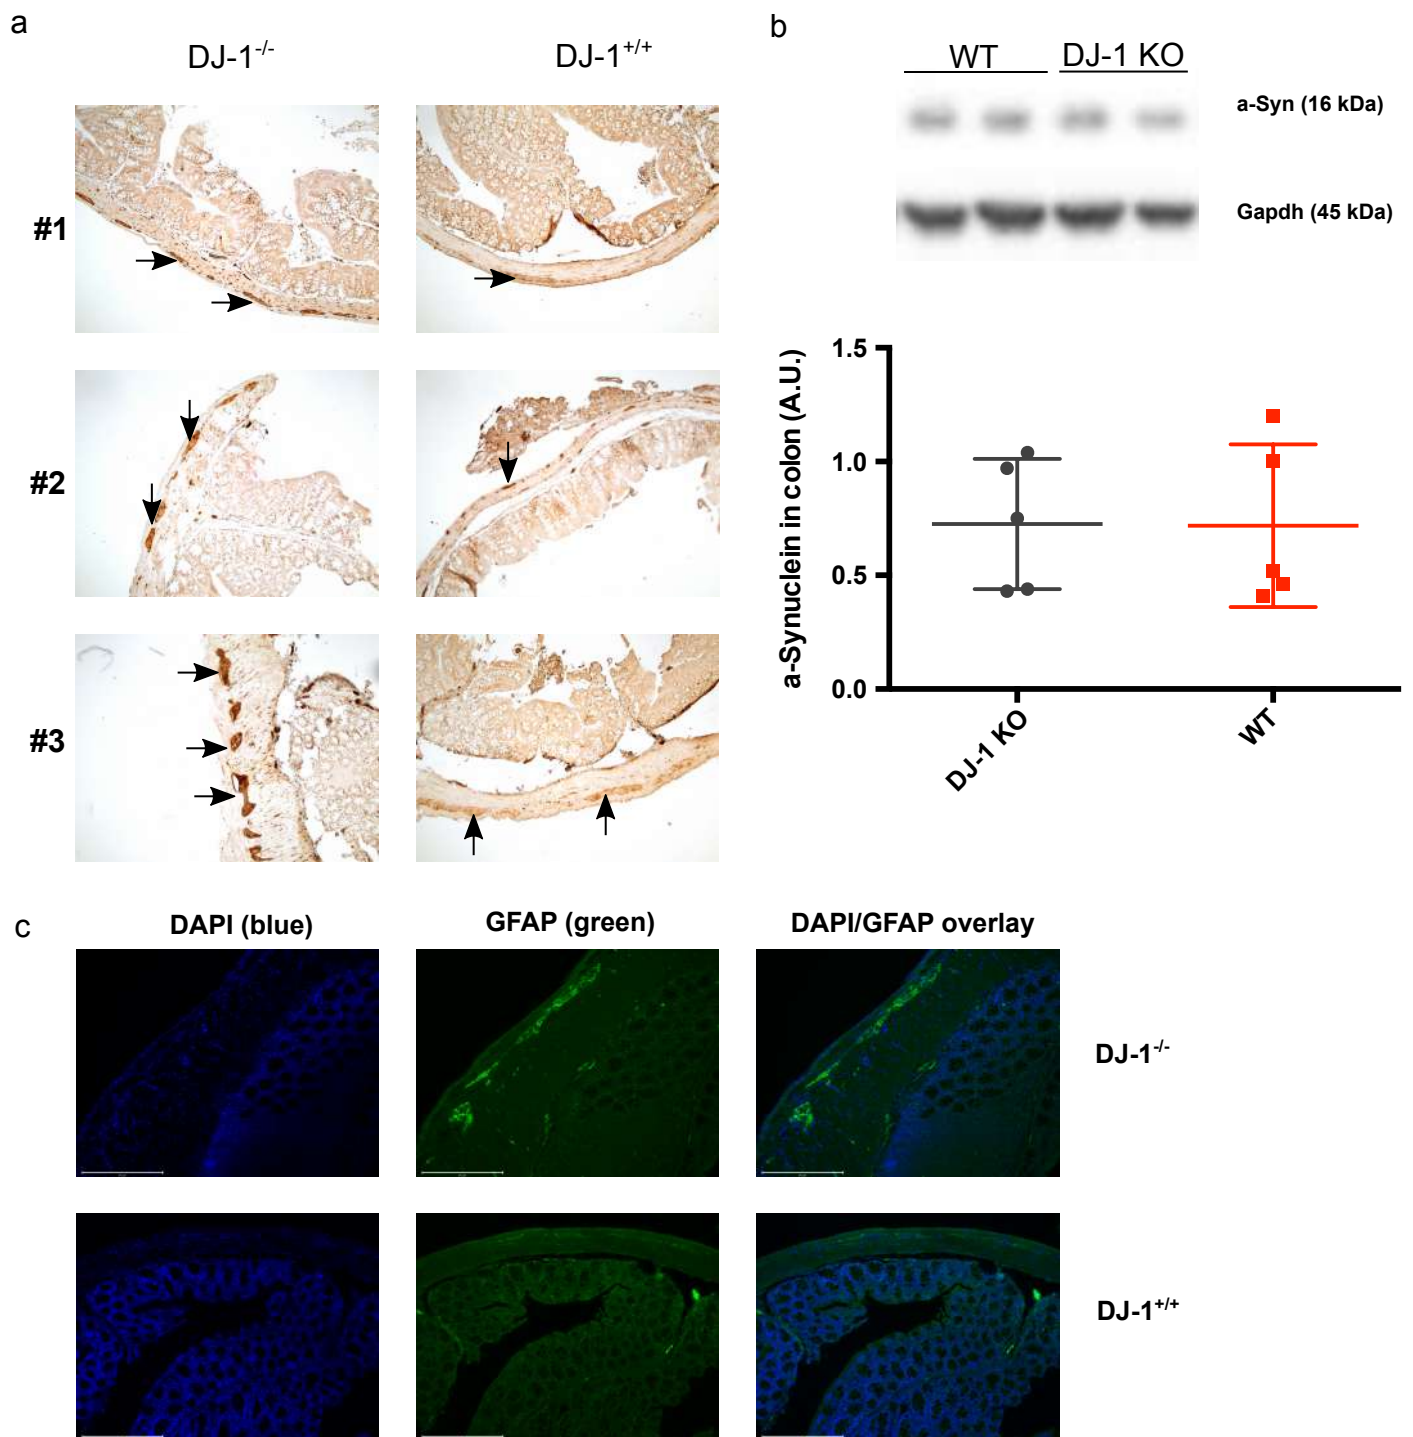

a

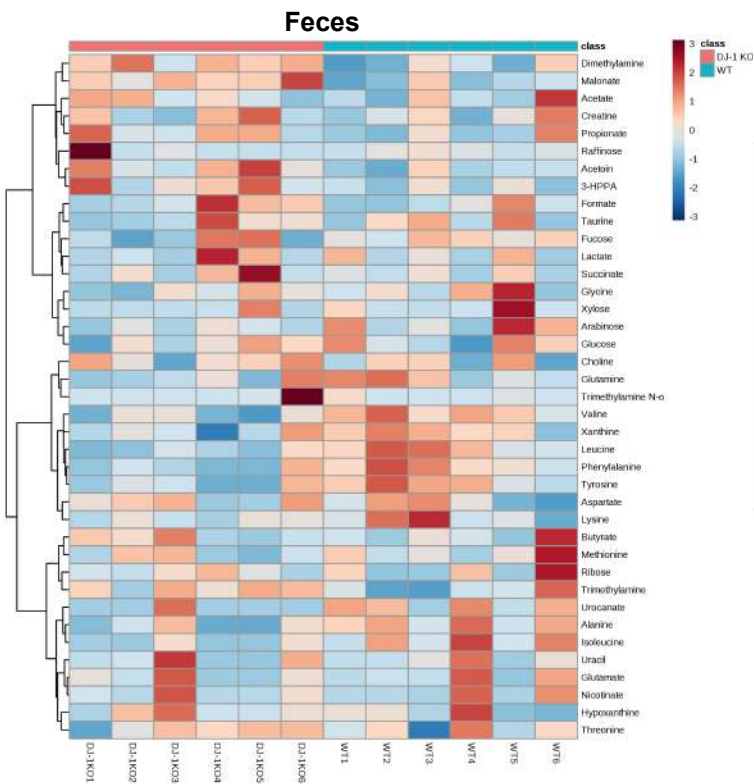

b

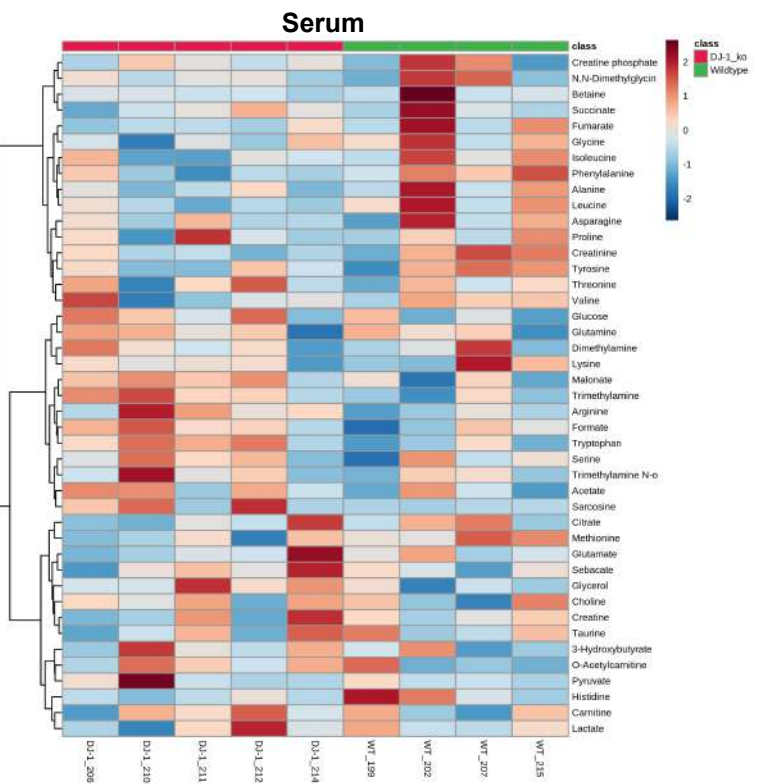

c

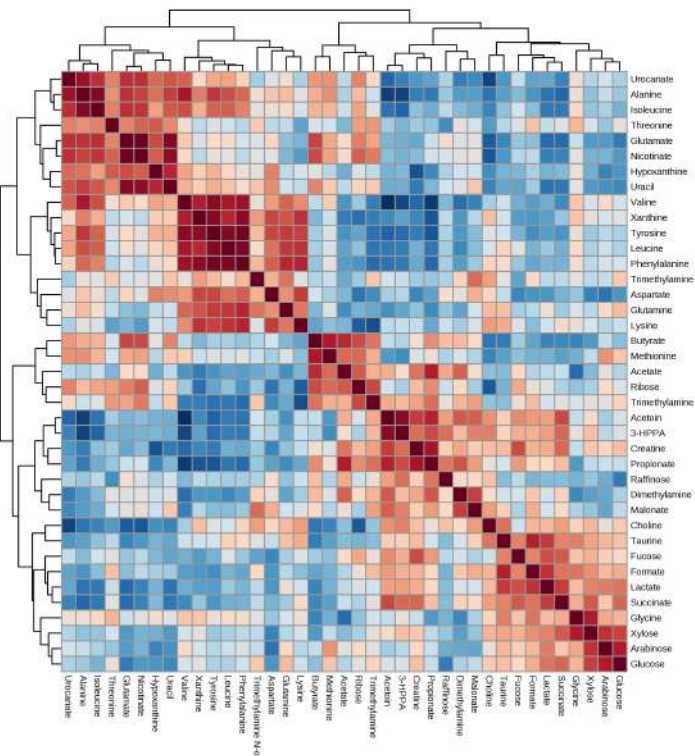

d

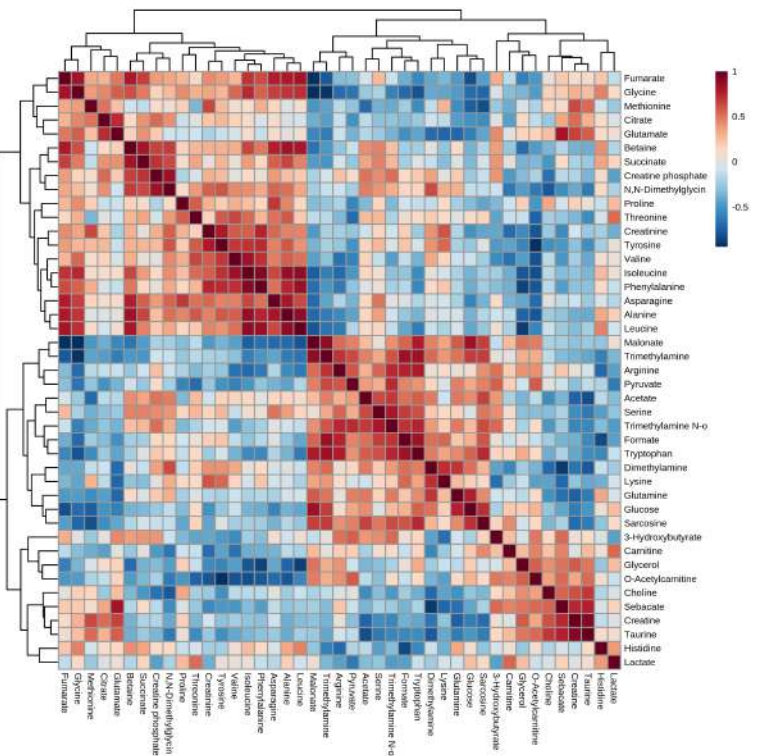

Suppl. Fig. 5

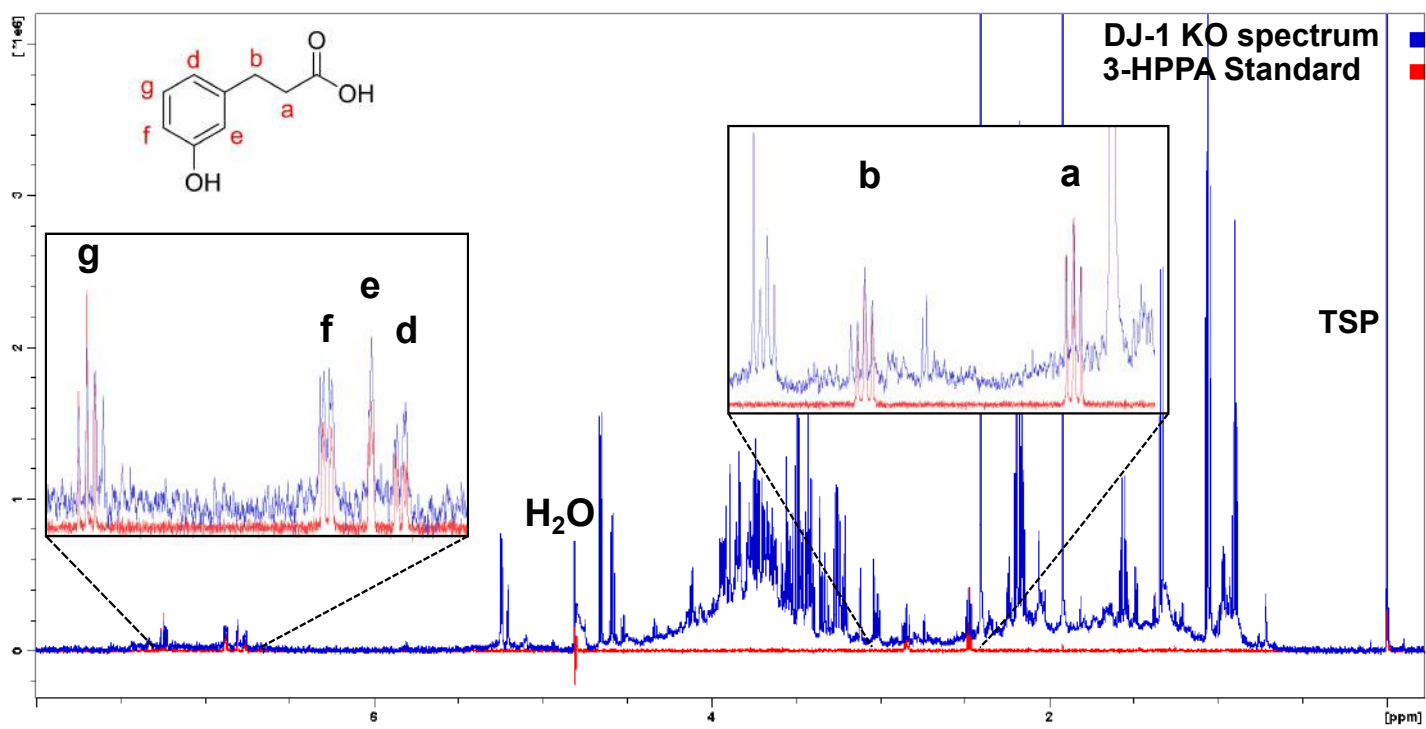

Suppl. Fig. 6

**a**

**Original WBs**

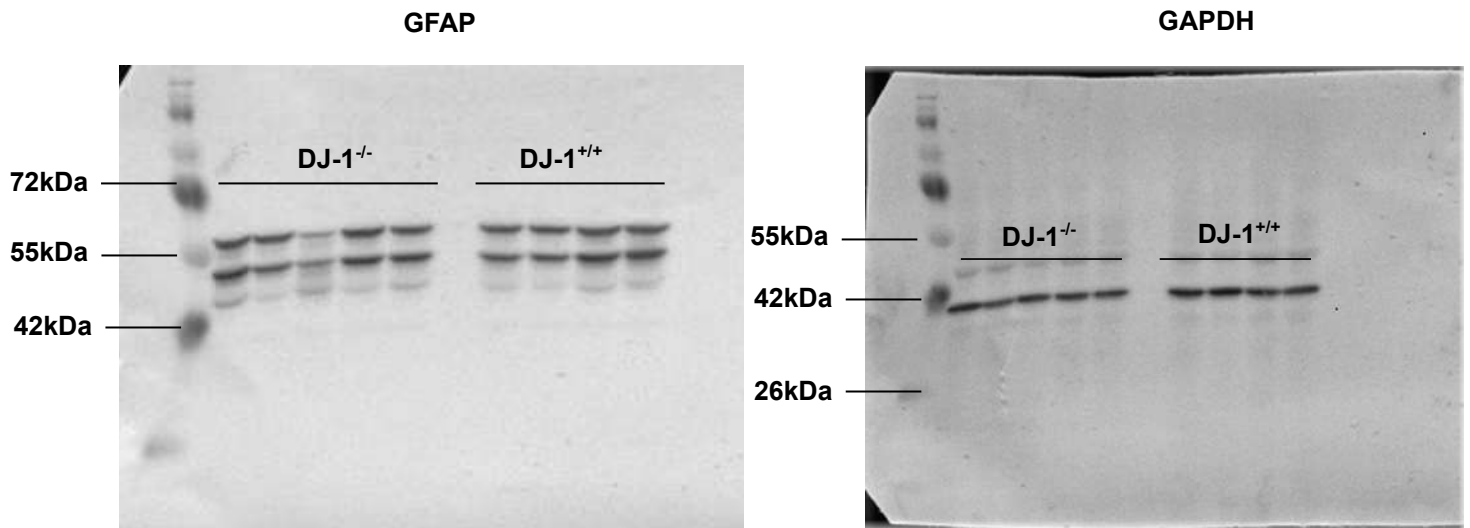

**b**

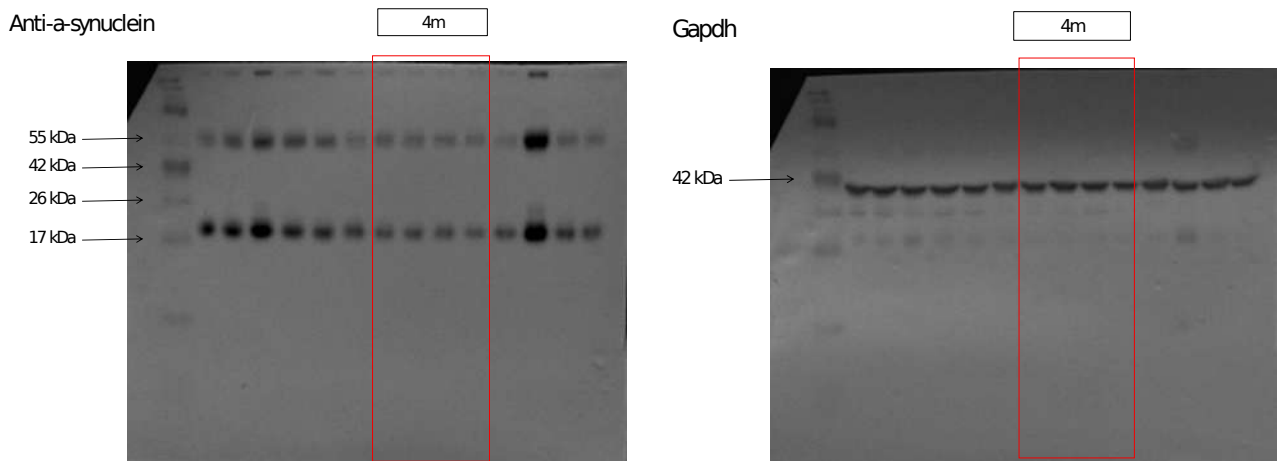

**c**

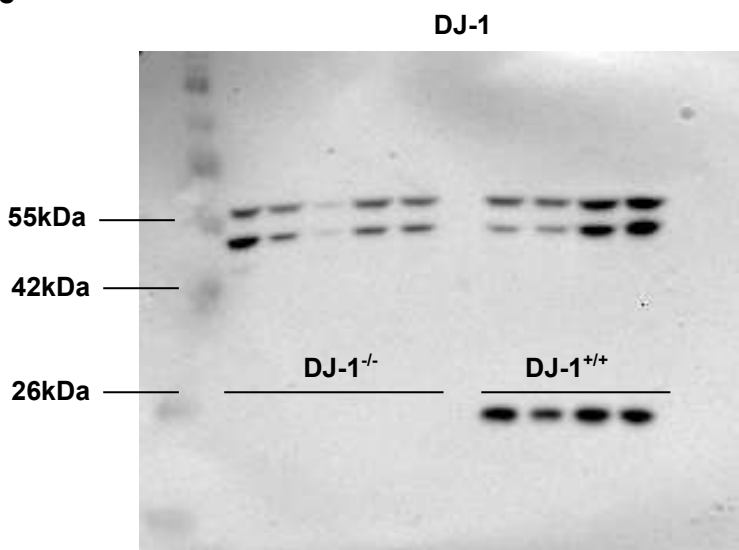



## Suppl. Table 1 Samples

| NameInternal | NameExternal     | Group |
|--------------|------------------|-------|
| 20056a001_01 | WT-1 (199)       | wt    |
| 20056a002_01 | WT-2 (202)       | wt    |
| 20056a003_01 | WT-3 (207)       | wt    |
| 20056a004_01 | WT-4 (215)       | wt    |
| 20056a005_01 | DJ-1 KO-1 (206)  | ko    |
| 20056a006_01 | DJ-1 KO-2 (210)  | ko    |
| 20056a007_01 | DJ-1 KO-3 ((211) | ko    |
| 20056a008_01 | DJ-1 KO-4 (212)  | ko    |
| 20056a009_01 | DJ-1 KO-5 (214)  | ko    |

## Summary

Model: ~ Group

Filter: p-value < 0.05

| Name | Description              | up  | down | total |
|------|--------------------------|-----|------|-------|
| ko   | Knockout samples compare | 275 | 254  | 529   |

## Gene Overview

| gene_id             | symbol        | ko | ko_logFC |
|---------------------|---------------|----|----------|
| ENSMUSG000000031075 | Ano1          | up | 5.19     |
| ENSMUSG000000005800 | Mmp8          | up | 4.35     |
| ENSMUSG000000033788 | Dysf          | up | 4.21     |
| ENSMUSG000000040681 | Hmgn1         | up | 4.00     |
| ENSMUSG000000085386 | Gm13630       | up | 3.99     |
| ENSMUSG000000064310 | Zpld1         | up | 3.99     |
| ENSMUSG000000026621 | Marc1         | up | 3.85     |
| ENSMUSG000000068220 | Lgals1        | up | 3.66     |
| ENSMUSG000000104445 | Rhbg          | up | 3.13     |
| ENSMUSG000000062319 | Gm10115       | up | 3.12     |
| ENSMUSG000000100484 | Gm7133        | up | 2.97     |
| ENSMUSG000000083087 | Gm11249       | up | 2.88     |
| ENSMUSG000000058290 | Espl1         | up | 2.88     |
| ENSMUSG000000106384 | Gm43188       | up | 2.69     |
| ENSMUSG000000104257 | Gm20172       | up | 2.57     |
| ENSMUSG000000109982 | Gm45520       | up | 2.46     |
| ENSMUSG000000105940 | Gm42635       | up | 2.45     |
| ENSMUSG000000062393 | Dgkk          | up | 2.33     |
| ENSMUSG000000099422 | Gm4275        | up | 2.32     |
| ENSMUSG000000108046 | Gm43924       | up | 2.32     |
| ENSMUSG000000048371 | Pdp2          | up | 2.32     |
| ENSMUSG000000093277 | Gm26236       | up | 2.30     |
| ENSMUSG000000059183 | Mtfmt         | up | 2.30     |
| ENSMUSG000000031503 | Col4a2        | up | 2.29     |
| ENSMUSG000000073209 | Klf14         | up | 2.25     |
| ENSMUSG000000005983 | 1700037C18Rik | up | 2.22     |

|                    |               |    |      |
|--------------------|---------------|----|------|
| ENSMUSG00000031078 | Cttn          | up | 2.20 |
| ENSMUSG00000067795 | 4930444P10Rik | up | 2.18 |
| ENSMUSG00000058486 | Wdr91         | up | 2.18 |
| ENSMUSG00000027224 | Duoxa1        | up | 2.18 |
| ENSMUSG00000110394 | Gm18991       | up | 2.18 |
| ENSMUSG00000060427 | Zfp868        | up | 2.18 |
| ENSMUSG00000100396 | Gm29367       | up | 2.17 |
| ENSMUSG00000040253 | Gbp7          | up | 2.13 |
| ENSMUSG00000049409 | Prokr1        | up | 2.12 |
| ENSMUSG00000105107 | Gm43412       | up | 2.11 |
| ENSMUSG00000113689 | AC159239.2    | up | 2.04 |
| ENSMUSG00000025876 | Unc5a         | up | 2.03 |
| ENSMUSG00000069301 | Hist1h2ag     | up | 2.03 |
| ENSMUSG00000060224 | Pyroxd2       | up | 2.03 |
| ENSMUSG00000036931 | Nfkbid        | up | 2.03 |
| ENSMUSG00000064609 | Gm25635       | up | 2.02 |
| ENSMUSG00000110465 | Gm45832       | up | 1.96 |
| ENSMUSG00000086000 | Gm12493       | up | 1.95 |
| ENSMUSG00000106707 | Gm43748       | up | 1.95 |
| ENSMUSG00000021609 | Slc6a3        | up | 1.93 |
| ENSMUSG00000085033 | Gm11646       | up | 1.93 |
| ENSMUSG00000114064 | AC155260.1    | up | 1.93 |
| ENSMUSG00000017204 | Gsdma         | up | 1.92 |
| ENSMUSG00000040521 | Tsfm          | up | 1.92 |
| ENSMUSG00000112304 | AC158633.1    | up | 1.92 |
| ENSMUSG00000040146 | Rgl3          | up | 1.91 |
| ENSMUSG00000055633 | Zfp580        | up | 1.88 |
| ENSMUSG00000014602 | Kif1a         | up | 1.82 |
| ENSMUSG00000036721 | Zscan12       | up | 1.79 |
| ENSMUSG00000026860 | Sh3glb2       | up | 1.72 |
| ENSMUSG00000091514 | Gm17484       | up | 1.72 |
| ENSMUSG00000074483 | Bglap         | up | 1.68 |
| ENSMUSG00000040447 | Spns2         | up | 1.67 |
| ENSMUSG00000110758 | AC153729.1    | up | 1.66 |
| ENSMUSG00000112597 | AC153974.2    | up | 1.63 |
| ENSMUSG00000086234 | Usp46os2      | up | 1.63 |
| ENSMUSG00000114907 | AC173482.6    | up | 1.59 |
| ENSMUSG00000108659 | Gm34121       | up | 1.58 |
| ENSMUSG00000114066 | AC158354.2    | up | 1.57 |
| ENSMUSG00000039628 | Hs3st6        | up | 1.48 |
| ENSMUSG00000031174 | Rpgr          | up | 1.44 |
| ENSMUSG00000036196 | Slc26a8       | up | 1.40 |
| ENSMUSG00000086206 | Gm13783       | up | 1.39 |
| ENSMUSG00000117982 |               | up | 1.36 |
| ENSMUSG00000024295 | Cyp4f41-ps    | up | 1.35 |
| ENSMUSG00000073838 | Tufm          | up | 1.34 |
| ENSMUSG00000103059 | Gm18186       | up | 1.32 |
| ENSMUSG00000061374 | Fiz1          | up | 1.29 |
| ENSMUSG00000097885 | 5031434O11Rik | up | 1.28 |
| ENSMUSG00000006673 | Qrich1        | up | 1.27 |
| ENSMUSG00000104612 | Gm42449       | up | 1.25 |
| ENSMUSG00000059851 | Kmt5c         | up | 1.24 |

|                    |               |    |      |
|--------------------|---------------|----|------|
| ENSMUSG00000113022 | CT025623.1    | up | 1.20 |
| ENSMUSG00000109314 | Gm44699       | up | 1.18 |
| ENSMUSG00000108624 | Gm45091       | up | 1.16 |
| ENSMUSG00000037605 | Adgrl3        | up | 1.16 |
| ENSMUSG00000032563 | Mrpl3         | up | 1.14 |
| ENSMUSG00000032591 | Mst1          | up | 1.13 |
| ENSMUSG00000106856 | Gm43761       | up | 1.10 |
| ENSMUSG00000054764 | Mtnr1a        | up | 1.10 |
| ENSMUSG00000048388 | Fam171b       | up | 1.09 |
| ENSMUSG00000110455 | Gm45904       | up | 1.08 |
| ENSMUSG00000107232 | 1700017L05Rik | up | 1.08 |
| ENSMUSG00000020732 | Rab37         | up | 1.07 |
| ENSMUSG00000031661 | Nkd1          | up | 1.07 |
| ENSMUSG00000113842 | AC122828.3    | up | 1.05 |
| ENSMUSG00000109992 | Gm45650       | up | 1.05 |
| ENSMUSG00000019984 | Med23         | up | 1.02 |
| ENSMUSG00000027660 | Skil          | up | 1.01 |
| ENSMUSG00000026854 | Usp20         | up | 0.98 |
| ENSMUSG00000051000 | Fam160a1      | up | 0.94 |
| ENSMUSG00000060671 | Atp8b2        | up | 0.93 |
| ENSMUSG00000048234 | Rnf149        | up | 0.93 |
| ENSMUSG00000053897 | Slc39a8       | up | 0.90 |
| ENSMUSG00000030062 | Rpn1          | up | 0.89 |
| ENSMUSG00000003585 | Sec14l2       | up | 0.89 |
| ENSMUSG00000063434 | Sorcs3        | up | 0.88 |
| ENSMUSG00000080316 | Spaca6        | up | 0.88 |
| ENSMUSG00000049690 | Nckap5        | up | 0.85 |
| ENSMUSG00000035530 | Eif1          | up | 0.85 |
| ENSMUSG00000038600 | Atp6v0a4      | up | 0.85 |
| ENSMUSG00000103643 | Gm37770       | up | 0.85 |
| ENSMUSG00000114959 | AC154314.2    | up | 0.83 |
| ENSMUSG00000013367 | Igln5         | up | 0.83 |
| ENSMUSG00000074217 | 2210011C24Rik | up | 0.82 |
| ENSMUSG00000027344 | Fsip1         | up | 0.81 |
| ENSMUSG00000094443 | Sgo2b         | up | 0.80 |
| ENSMUSG00000096957 | E230013L22Rik | up | 0.78 |
| ENSMUSG00000020299 | 4930524B15Rik | up | 0.77 |
| ENSMUSG00000029674 | Limk1         | up | 0.76 |
| ENSMUSG00000040506 | Ambra1        | up | 0.76 |
| ENSMUSG00000050840 | Cdh20         | up | 0.76 |
| ENSMUSG00000051669 | AU021092      | up | 0.76 |
| ENSMUSG00000084093 | Gm16418       | up | 0.73 |
| ENSMUSG00000105282 | Gm42981       | up | 0.72 |
| ENSMUSG00000105352 | C030018K13Rik | up | 0.72 |
| ENSMUSG00000030737 | Slco2b1       | up | 0.71 |
| ENSMUSG00000115624 |               | up | 0.71 |
| ENSMUSG00000115599 |               | up | 0.70 |
| ENSMUSG00000007080 | Pole          | up | 0.68 |
| ENSMUSG00000020526 | Znhit3        | up | 0.68 |
| ENSMUSG00000057182 | Scn3a         | up | 0.68 |
| ENSMUSG00000104974 | Gm43686       | up | 0.67 |
| ENSMUSG00000051224 | Tceanc        | up | 0.67 |

|                    |               |    |      |
|--------------------|---------------|----|------|
| ENSMUSG00000056019 | Zfp709        | up | 0.65 |
| ENSMUSG00000034203 | Chchd4        | up | 0.65 |
| ENSMUSG00000063870 | Chd4          | up | 0.65 |
| ENSMUSG00000035235 | Trim13        | up | 0.65 |
| ENSMUSG00000020700 | Map3k3        | up | 0.65 |
| ENSMUSG00000107698 | Gm44430       | up | 0.65 |
| ENSMUSG00000031388 | Naa10         | up | 0.64 |
| ENSMUSG00000104686 | Gm42815       | up | 0.63 |
| ENSMUSG00000110393 | Gm36445       | up | 0.62 |
| ENSMUSG00000004043 | Stat5a        | up | 0.61 |
| ENSMUSG00000006299 | Aamp          | up | 0.61 |
| ENSMUSG00000104410 | Gm37066       | up | 0.61 |
| ENSMUSG00000044824 | Olfir545      | up | 0.60 |
| ENSMUSG00000026411 | Tmem9         | up | 0.60 |
| ENSMUSG00000068243 | Gm7079        | up | 0.59 |
| ENSMUSG00000024909 | Efemp2        | up | 0.59 |
| ENSMUSG00000038342 | Mlxip         | up | 0.59 |
| ENSMUSG00000028433 | Ubap2         | up | 0.58 |
| ENSMUSG00000025147 | Mob2          | up | 0.58 |
| ENSMUSG00000046314 | Stxbp6        | up | 0.58 |
| ENSMUSG00000045917 | Tmem268       | up | 0.57 |
| ENSMUSG00000039747 | Orai2         | up | 0.56 |
| ENSMUSG00000112449 | Srp54a        | up | 0.55 |
| ENSMUSG00000117768 |               | up | 0.55 |
| ENSMUSG00000042540 | Acot5         | up | 0.55 |
| ENSMUSG00000033569 | Adgrb3        | up | 0.55 |
| ENSMUSG00000110404 | Rnf223        | up | 0.54 |
| ENSMUSG00000029507 | Pus1          | up | 0.53 |
| ENSMUSG00000034893 | Cog3          | up | 0.53 |
| ENSMUSG00000032017 | Grik4         | up | 0.52 |
| ENSMUSG00000037638 | Zbtb42        | up | 0.51 |
| ENSMUSG00000022488 | Nckap1l       | up | 0.51 |
| ENSMUSG00000102139 | Gm37109       | up | 0.51 |
| ENSMUSG00000028443 | Nudt2         | up | 0.50 |
| ENSMUSG00000046111 | Cep295        | up | 0.50 |
| ENSMUSG00000008976 | Gabpa         | up | 0.49 |
| ENSMUSG00000112099 | AC129329.1    | up | 0.49 |
| ENSMUSG00000009628 | Tex15         | up | 0.49 |
| ENSMUSG00000021536 | Adcy2         | up | 0.49 |
| ENSMUSG00000012187 | Mogat1        | up | 0.48 |
| ENSMUSG00000024498 | Tcerg1        | up | 0.48 |
| ENSMUSG00000002076 | Hsf2bp        | up | 0.48 |
| ENSMUSG00000032456 | Nmnat3        | up | 0.47 |
| ENSMUSG00000107534 | Gm43920       | up | 0.47 |
| ENSMUSG00000060843 | Ctnna3        | up | 0.47 |
| ENSMUSG00000022748 | Cmss1         | up | 0.47 |
| ENSMUSG00000106802 | Gm42885       | up | 0.46 |
| ENSMUSG00000097023 | Mir9-3hg      | up | 0.46 |
| ENSMUSG00000025086 | Trub1         | up | 0.46 |
| ENSMUSG00000103996 | 4833421G17Rik | up | 0.45 |
| ENSMUSG00000107655 | Gm44220       | up | 0.45 |
| ENSMUSG00000100147 | 1700047M11Rik | up | 0.44 |

|                     |               |    |      |
|---------------------|---------------|----|------|
| ENSMUSG00000026496  | Parp1         | up | 0.44 |
| ENSMUSG00000034187  | Nsf           | up | 0.43 |
| ENSMUSG00000046727  | Cystm1        | up | 0.43 |
| ENSMUSG000000116919 |               | up | 0.43 |
| ENSMUSG00000030741  | Spns1         | up | 0.41 |
| ENSMUSG00000059173  | Pde1a         | up | 0.41 |
| ENSMUSG00000095440  | Figl2         | up | 0.40 |
| ENSMUSG00000026608  | Kctd3         | up | 0.40 |
| ENSMUSG00000020396  | Nefh          | up | 0.40 |
| ENSMUSG00000073236  | 2500004C02Rik | up | 0.40 |
| ENSMUSG00000078963  | Hsbp111       | up | 0.39 |
| ENSMUSG00000022664  | Slc35a5       | up | 0.39 |
| ENSMUSG00000024006  | Stk38         | up | 0.39 |
| ENSMUSG00000020952  | Scfd1         | up | 0.39 |
| ENSMUSG00000037544  | Dlgap5        | up | 0.39 |
| ENSMUSG000000117869 |               | up | 0.38 |
| ENSMUSG000000114705 | CT009536.2    | up | 0.38 |
| ENSMUSG000000104379 | Gm37509       | up | 0.38 |
| ENSMUSG00000074261  | Erich4        | up | 0.38 |
| ENSMUSG00000078867  | Gm14418       | up | 0.38 |
| ENSMUSG00000028622  | Mrpl37        | up | 0.38 |
| ENSMUSG00000019961  | Tmpo          | up | 0.37 |
| ENSMUSG00000026339  | Ccdc93        | up | 0.37 |
| ENSMUSG00000090125  | Pou3f1        | up | 0.37 |
| ENSMUSG00000046658  | Zfp316        | up | 0.37 |
| ENSMUSG00000079108  | Srp54b        | up | 0.36 |
| ENSMUSG00000024084  | Qpct          | up | 0.36 |
| ENSMUSG000000104164 | Gm38248       | up | 0.35 |
| ENSMUSG00000020260  | Pofut2        | up | 0.35 |
| ENSMUSG00000021485  | Mxd3          | up | 0.35 |
| ENSMUSG00000030452  | Nipa2         | up | 0.34 |
| ENSMUSG00000031871  | Cdh5          | up | 0.34 |
| ENSMUSG00000025872  | Thoc3         | up | 0.34 |
| ENSMUSG00000020963  | Tshr          | up | 0.34 |
| ENSMUSG00000020407  | Upp1          | up | 0.33 |
| ENSMUSG00000044005  | Gls2          | up | 0.32 |
| ENSMUSG00000026283  | Ing5          | up | 0.32 |
| ENSMUSG00000091194  | Gm19840       | up | 0.32 |
| ENSMUSG00000078247  | Airn          | up | 0.32 |
| ENSMUSG00000055415  | Atp10b        | up | 0.32 |
| ENSMUSG00000085862  | Gm13483       | up | 0.31 |
| ENSMUSG00000029621  | Arpc1a        | up | 0.31 |
| ENSMUSG0000002055   | Spag5         | up | 0.31 |
| ENSMUSG00000020032  | Nuak1         | up | 0.31 |
| ENSMUSG00000097316  | Gm10516       | up | 0.31 |
| ENSMUSG000000116926 |               | up | 0.31 |
| ENSMUSG00000084964  | Gm15503       | up | 0.30 |
| ENSMUSG00000050002  | ldnk          | up | 0.30 |
| ENSMUSG00000097156  | Gm3764        | up | 0.30 |
| ENSMUSG00000010122  | Slc47a1       | up | 0.29 |
| ENSMUSG00000083512  | Gm12749       | up | 0.28 |
| ENSMUSG00000033628  | Pik3c3        | up | 0.28 |

|                     |          |      |       |
|---------------------|----------|------|-------|
| ENSMUSG00000097823  | Gm16701  | up   | 0.28  |
| ENSMUSG00000027091  | Zc3h15   | up   | 0.28  |
| ENSMUSG00000021367  | Edn1     | up   | 0.28  |
| ENSMUSG00000031958  | Ldhd     | up   | 0.27  |
| ENSMUSG00000021007  | Spata7   | up   | 0.27  |
| ENSMUSG00000039826  | Trub2    | up   | 0.26  |
| ENSMUSG00000027722  | Spata5   | up   | 0.26  |
| ENSMUSG00000049604  | Hoxb13   | up   | 0.26  |
| ENSMUSG00000003534  | Ddr1     | up   | 0.25  |
| ENSMUSG00000027673  | Ndufb5   | up   | 0.25  |
| ENSMUSG000000117406 |          | up   | 0.25  |
| ENSMUSG00000098188  | Sowahc   | up   | 0.25  |
| ENSMUSG00000022377  | Asap1    | up   | 0.24  |
| ENSMUSG000000109080 | Gm38944  | up   | 0.24  |
| ENSMUSG00000006724  | Cyp27b1  | up   | 0.24  |
| ENSMUSG00000021469  | Msx2     | up   | 0.24  |
| ENSMUSG000000105374 | Gm42551  | up   | 0.23  |
| ENSMUSG00000037610  | Kcnmb2   | up   | 0.23  |
| ENSMUSG00000020869  | Lrrc59   | up   | 0.23  |
| ENSMUSG00000021998  | Lcp1     | up   | 0.23  |
| ENSMUSG00000028221  | Tmem55a  | up   | 0.23  |
| ENSMUSG000000103928 | Gm37893  | up   | 0.22  |
| ENSMUSG00000098557  | Kctd12   | up   | 0.21  |
| ENSMUSG00000021327  | Zkscan3  | up   | 0.21  |
| ENSMUSG00000015002  | Efr3a    | up   | 0.21  |
| ENSMUSG00000020123  | Avpr1a   | up   | 0.21  |
| ENSMUSG0000002608   | Ccdc97   | up   | 0.21  |
| ENSMUSG00000024030  | Abcg1    | up   | 0.20  |
| ENSMUSG00000057409  | Zfp53    | up   | 0.20  |
| ENSMUSG000000115012 |          | up   | 0.20  |
| ENSMUSG00000030465  | Psd3     | up   | 0.20  |
| ENSMUSG00000044296  | Zfp879   | up   | 0.19  |
| ENSMUSG000000102801 | Gm37478  | up   | 0.19  |
| ENSMUSG00000060180  | Myh13    | up   | 0.19  |
| ENSMUSG00000074652  | Myh7b    | up   | 0.18  |
| ENSMUSG00000051879  | Krt71    | up   | 0.18  |
| ENSMUSG00000096006  | Gm21596  | up   | 0.18  |
| ENSMUSG00000090486  | BC035947 | up   | 0.17  |
| ENSMUSG00000064653  | Gm26129  | up   | 0.17  |
| ENSMUSG00000048895  | Cdk5r1   | up   | 0.17  |
| ENSMUSG00000015702  | Anxa9    | up   | 0.16  |
| ENSMUSG00000021965  | Ska3     | down | -0.15 |
| ENSMUSG00000097525  | Platr31  | down | -0.16 |
| ENSMUSG00000052981  | Ube2ql1  | down | -0.16 |
| ENSMUSG00000038250  | Usp38    | down | -0.17 |
| ENSMUSG00000062075  | Lmnb2    | down | -0.17 |
| ENSMUSG00000034083  | Ccdc174  | down | -0.18 |
| ENSMUSG00000031027  | Stk33    | down | -0.18 |
| ENSMUSG00000086944  | Gm15859  | down | -0.18 |
| ENSMUSG00000091931  | Gon7     | down | -0.18 |
| ENSMUSG00000004730  | Adgre1   | down | -0.18 |
| ENSMUSG00000036561  | Ppp6r2   | down | -0.18 |

|                     |                |      |       |
|---------------------|----------------|------|-------|
| ENSMUSG00000021697  | Depdc1b        | down | -0.18 |
| ENSMUSG00000042155  | Klhl23         | down | -0.18 |
| ENSMUSG00000067872  | Ccdc87         | down | -0.19 |
| ENSMUSG00000039686  | Zer1           | down | -0.19 |
| ENSMUSG00000019851  | Perp           | down | -0.19 |
| ENSMUSG00000026036  | Nif3l1         | down | -0.19 |
| ENSMUSG00000028436  | Dcaf12         | down | -0.19 |
| ENSMUSG00000052387  | Trpm3          | down | -0.19 |
| ENSMUSG00000027380  | Acox1          | down | -0.19 |
| ENSMUSG00000083844  | Ube2d-ps       | down | -0.19 |
| ENSMUSG00000042211  | Fbxo38         | down | -0.19 |
| ENSMUSG00000020235  | Fzr1           | down | -0.19 |
| ENSMUSG00000055301  | Adh7           | down | -0.19 |
| ENSMUSG000000115338 |                | down | -0.20 |
| ENSMUSG00000062433  | Krtap6-2       | down | -0.20 |
| ENSMUSG00000058835  | Abi1           | down | -0.20 |
| ENSMUSG00000097164  | Cep83os        | down | -0.20 |
| ENSMUSG00000090291  | Lrrc10b        | down | -0.20 |
| ENSMUSG00000024845  | Tmem134        | down | -0.20 |
| ENSMUSG00000035840  | Lysmd3         | down | -0.20 |
| ENSMUSG00000068205  | MacroD2        | down | -0.20 |
| ENSMUSG000000115264 |                | down | -0.20 |
| ENSMUSG00000026697  | Myoc           | down | -0.20 |
| ENSMUSG00000028226  | Mmp16          | down | -0.21 |
| ENSMUSG00000001436  | Slc19a1        | down | -0.21 |
| ENSMUSG00000021903  | Galnt15        | down | -0.21 |
| ENSMUSG00000069539  | Scyl2          | down | -0.21 |
| ENSMUSG000000113903 | CT485612.11    | down | -0.21 |
| ENSMUSG00000019774  | Mtrf1l         | down | -0.21 |
| ENSMUSG00000028369  | Svep1          | down | -0.21 |
| ENSMUSG00000019718  | L3hypdh        | down | -0.21 |
| ENSMUSG00000003549  | Erc1           | down | -0.21 |
| ENSMUSG00000032942  | Ucp3           | down | -0.21 |
| ENSMUSG00000034317  | Trim59         | down | -0.21 |
| ENSMUSG00000038550  | Ciart          | down | -0.21 |
| ENSMUSG00000043019  | Edem3          | down | -0.21 |
| ENSMUSG00000020850  | Prpf8          | down | -0.21 |
| ENSMUSG00000035722  | Abca7          | down | -0.22 |
| ENSMUSG00000038150  | Ormdl3         | down | -0.22 |
| ENSMUSG00000018322  | Tomm34         | down | -0.22 |
| ENSMUSG00000069844  | Sco1           | down | -0.22 |
| ENSMUSG00000054312  | Mrps21         | down | -0.22 |
| ENSMUSG00000020519  | Sap30l         | down | -0.22 |
| ENSMUSG00000020062  | Slc5a8         | down | -0.22 |
| ENSMUSG00000020124  | Usp15          | down | -0.22 |
| ENSMUSG00000069814  | Ccdc92b        | down | -0.23 |
| ENSMUSG00000027669  | Gnb4           | down | -0.23 |
| ENSMUSG00000069893  | 9930111J21Rik1 | down | -0.23 |
| ENSMUSG00000039097  | Rln1           | down | -0.24 |
| ENSMUSG00000085845  | Gm13944        | down | -0.24 |
| ENSMUSG00000041731  | Pgm5           | down | -0.24 |
| ENSMUSG000000118274 |                | down | -0.24 |

|                    |               |      |       |
|--------------------|---------------|------|-------|
| ENSMUSG00000099874 | Gm29629       | down | -0.24 |
| ENSMUSG00000071054 | Safb          | down | -0.24 |
| ENSMUSG00000025925 | Terf1         | down | -0.24 |
| ENSMUSG00000025609 | Mkln1         | down | -0.24 |
| ENSMUSG00000050737 | Ptges         | down | -0.24 |
| ENSMUSG00000028199 | Cryz          | down | -0.24 |
| ENSMUSG00000038128 | Camk4         | down | -0.25 |
| ENSMUSG00000020799 | Tekt1         | down | -0.25 |
| ENSMUSG00000062198 | 2700097O09Rik | down | -0.25 |
| ENSMUSG00000020844 | Nxn           | down | -0.25 |
| ENSMUSG00000040841 | Six5          | down | -0.25 |
| ENSMUSG00000045763 | Basp1         | down | -0.25 |
| ENSMUSG00000038871 | Bpgm          | down | -0.25 |
| ENSMUSG00000054728 | Phactr1       | down | -0.25 |
| ENSMUSG00000071660 | Ttc9c         | down | -0.25 |
| ENSMUSG00000020736 | Nt5c          | down | -0.26 |
| ENSMUSG00000035890 | Rnf126        | down | -0.26 |
| ENSMUSG00000037935 | Smarce1       | down | -0.26 |
| ENSMUSG00000000296 | Tpd52l1       | down | -0.26 |
| ENSMUSG00000071713 | Csf2rb        | down | -0.26 |
| ENSMUSG00000104362 | Gm37928       | down | -0.26 |
| ENSMUSG00000022594 | Lynx1         | down | -0.26 |
| ENSMUSG00000028016 | Ints12        | down | -0.27 |
| ENSMUSG00000060923 | Acyp2         | down | -0.27 |
| ENSMUSG00000015599 | Ttbk1         | down | -0.27 |
| ENSMUSG00000069094 | Pde7a         | down | -0.27 |
| ENSMUSG00000079259 | Trim71        | down | -0.27 |
| ENSMUSG00000065922 | n-R5-8s1      | down | -0.27 |
| ENSMUSG00000047787 | Flrt1         | down | -0.27 |
| ENSMUSG00000025816 | Sec61a2       | down | -0.27 |
| ENSMUSG00000025102 | 3110040N11Rik | down | -0.27 |
| ENSMUSG00000085067 | Gm15631       | down | -0.27 |
| ENSMUSG00000067158 | Col4a4        | down | -0.28 |
| ENSMUSG00000077350 | n-R5s31       | down | -0.28 |
| ENSMUSG00000071356 | Reg3b         | down | -0.29 |
| ENSMUSG00000116348 |               | down | -0.29 |
| ENSMUSG00000085176 | Gm15397       | down | -0.30 |
| ENSMUSG00000018761 | Mpdu1         | down | -0.31 |
| ENSMUSG00000028524 | Sgip1         | down | -0.31 |
| ENSMUSG00000105636 | Gm43625       | down | -0.32 |
| ENSMUSG00000005553 | Atp4a         | down | -0.33 |
| ENSMUSG00000097804 | Gm16685       | down | -0.33 |
| ENSMUSG00000103713 | Gm2136        | down | -0.34 |
| ENSMUSG00000021565 | Slc6a19       | down | -0.34 |
| ENSMUSG00000022565 | Plec          | down | -0.34 |
| ENSMUSG00000024906 | Mus81         | down | -0.34 |
| ENSMUSG00000040966 | Slc22a2       | down | -0.34 |
| ENSMUSG00000007872 | Id3           | down | -0.34 |
| ENSMUSG00000010721 | Lmbr1         | down | -0.34 |
| ENSMUSG00000004667 | Polr2e        | down | -0.35 |
| ENSMUSG00000030982 | 9030624J02Rik | down | -0.37 |
| ENSMUSG00000040987 | Mill2         | down | -0.37 |



|                     |               |      |       |
|---------------------|---------------|------|-------|
| ENSMUSG00000078808  | Vmn1r58       | down | -0.38 |
| ENSMUSG00000002833  | Hdgfl2        | down | -0.39 |
| ENSMUSG00000024427  | Spry4         | down | -0.40 |
| ENSMUSG000000116597 |               | down | -0.41 |
| ENSMUSG000000108798 | Gm9521        | down | -0.42 |
| ENSMUSG00000030806  | Stx1b         | down | -0.44 |
| ENSMUSG00000030726  | Pold3         | down | -0.45 |
| ENSMUSG00000003382  | Etv3          | down | -0.45 |
| ENSMUSG000000104969 | Gm43445       | down | -0.49 |
| ENSMUSG00000022658  | Tagln3        | down | -0.50 |
| ENSMUSG000000118207 |               | down | -0.51 |
| ENSMUSG00000028776  | Tinagl1       | down | -0.51 |
| ENSMUSG000000105906 | Iglc1         | down | -0.52 |
| ENSMUSG00000042102  | Dmgdh         | down | -0.53 |
| ENSMUSG00000004344  | Gpx5          | down | -0.54 |
| ENSMUSG000000054423 | Cadps         | down | -0.56 |
| ENSMUSG000000089941 | Gm16168       | down | -0.56 |
| ENSMUSG00000041891  | Lman1         | down | -0.57 |
| ENSMUSG000000079465 | Col4a3        | down | -0.58 |
| ENSMUSG000000030666 | Calcb         | down | -0.60 |
| ENSMUSG00000028609  | Magoh         | down | -0.61 |
| ENSMUSG00000042788  | Fam166b       | down | -0.61 |
| ENSMUSG00000042167  | Papd4         | down | -0.64 |
| ENSMUSG00000073489  | Ifi204        | down | -0.64 |
| ENSMUSG000000102309 | Gm38189       | down | -0.64 |
| ENSMUSG000000038840 | Birc7         | down | -0.66 |
| ENSMUSG000000099034 | 2810039B14Rik | down | -0.68 |
| ENSMUSG00000073295  | Nudt11        | down | -0.69 |
| ENSMUSG00000027487  | Cdk5rap1      | down | -0.69 |
| ENSMUSG000000105021 | Gm8234        | down | -0.70 |
| ENSMUSG00000020152  | Actr2         | down | -0.73 |
| ENSMUSG00000021099  | Six6          | down | -0.79 |
| ENSMUSG000000057614 | Gnai1         | down | -0.80 |
| ENSMUSG00000002550  | Uck1          | down | -0.87 |
| ENSMUSG000000117350 |               | down | -0.88 |
| ENSMUSG000000112481 | AC155710.1    | down | -0.88 |
| ENSMUSG000000105294 | Gm43304       | down | -0.89 |
| ENSMUSG000000052403 | Fcnaos        | down | -0.91 |
| ENSMUSG000000097456 | Gm16958       | down | -0.92 |
| ENSMUSG00000028991  | Mtor          | down | -0.93 |
| ENSMUSG00000003435  | Supt5         | down | -0.94 |
| ENSMUSG000000097442 | Gm26632       | down | -0.94 |
| ENSMUSG00000030747  | Dgat2         | down | -0.94 |
| ENSMUSG00000027997  | Casp6         | down | -0.96 |
| ENSMUSG00000000686  | Abhd15        | down | -0.96 |
| ENSMUSG00000037086  | Prr32         | down | -0.99 |
| ENSMUSG00000033323  | Ctdp1         | down | -1.00 |
| ENSMUSG000000083142 | Gm12288       | down | -1.00 |
| ENSMUSG00000006763  | Saal1         | down | -1.05 |
| ENSMUSG00000015013  | Trappc2l      | down | -1.05 |
| ENSMUSG000000064585 | Gm25129       | down | -1.06 |
| ENSMUSG00000073007  | Fam46d        | down | -1.10 |

|                    |               |      |       |
|--------------------|---------------|------|-------|
| ENSMUSG00000048411 | Gm597         | down | -1.13 |
| ENSMUSG00000006154 | Eps8l1        | down | -1.13 |
| ENSMUSG00000031176 | Dynlt3        | down | -1.18 |
| ENSMUSG00000079410 | Gm2897        | down | -1.18 |
| ENSMUSG00000044442 | N6amt1        | down | -1.18 |
| ENSMUSG00000025350 | Rdh5          | down | -1.18 |
| ENSMUSG00000003420 | Fcgrt         | down | -1.21 |
| ENSMUSG00000110065 | Gm45588       | down | -1.23 |
| ENSMUSG00000034112 | Atp2c2        | down | -1.24 |
| ENSMUSG00000089679 | Gm16299       | down | -1.25 |
| ENSMUSG00000112941 | AC164441.1    | down | -1.26 |
| ENSMUSG00000028648 | Ndufs5        | down | -1.29 |
| ENSMUSG00000063129 | Aldoart2      | down | -1.30 |
| ENSMUSG00000061288 | Taok3         | down | -1.34 |
| ENSMUSG00000117910 |               | down | -1.36 |
| ENSMUSG00000029068 | Ccnl2         | down | -1.36 |
| ENSMUSG00000085316 | D330050G23Rik | down | -1.38 |
| ENSMUSG00000111834 | AL928687.1    | down | -1.41 |
| ENSMUSG00000071604 | Fam189a2      | down | -1.42 |
| ENSMUSG00000000628 | Hk2           | down | -1.46 |
| ENSMUSG00000029238 | Clock         | down | -1.47 |
| ENSMUSG00000035168 | Tanc1         | down | -1.47 |
| ENSMUSG00000030785 | Cox6a2        | down | -1.49 |
| ENSMUSG00000029575 | Mmab          | down | -1.49 |
| ENSMUSG00000078580 | E430018J23Rik | down | -1.49 |
| ENSMUSG00000029670 | Ing3          | down | -1.49 |
| ENSMUSG00000064063 | BC048507      | down | -1.50 |
| ENSMUSG00000023031 | Cela1         | down | -1.56 |
| ENSMUSG00000109127 | Gm31135       | down | -1.56 |
| ENSMUSG00000033904 | Ccp110        | down | -1.62 |
| ENSMUSG00000048355 | Arxes1        | down | -1.63 |
| ENSMUSG00000021012 | Zc3h14        | down | -1.63 |
| ENSMUSG00000109727 | Gm45464       | down | -1.64 |
| ENSMUSG00000025534 | Gusb          | down | -1.65 |
| ENSMUSG00000091735 | Gpr62         | down | -1.71 |
| ENSMUSG00000026098 | Pms1          | down | -1.72 |
| ENSMUSG00000045010 | Gm4779        | down | -1.80 |
| ENSMUSG00000033227 | Wnt6          | down | -1.83 |
| ENSMUSG00000069188 | Gm13192       | down | -1.85 |
| ENSMUSG00000024665 | Fads2         | down | -1.85 |
| ENSMUSG00000009108 | Gnat2         | down | -1.85 |
| ENSMUSG00000080773 | Gm12955       | down | -1.85 |
| ENSMUSG00000029020 | Mfn2          | down | -1.97 |
| ENSMUSG00000026473 | Glul          | down | -2.00 |
| ENSMUSG00000029056 | Pank4         | down | -2.01 |
| ENSMUSG00000086953 | Aknaos        | down | -2.03 |
| ENSMUSG00000040283 | Btnl9         | down | -2.03 |
| ENSMUSG00000025014 | Dntt          | down | -2.03 |
| ENSMUSG00000105528 | Gm43519       | down | -2.05 |
| ENSMUSG00000103011 | Gm8860        | down | -2.07 |
| ENSMUSG00000052698 | Tln2          | down | -2.07 |
| ENSMUSG00000109628 | BC024386      | down | -2.08 |

|                    |               |      |       |
|--------------------|---------------|------|-------|
| ENSMUSG00000098854 | Gm5118        | down | -2.08 |
| ENSMUSG00000060882 | Kcnd2         | down | -2.11 |
| ENSMUSG00000021972 | Hmbox1        | down | -2.19 |
| ENSMUSG00000041707 | 1810011H11Rik | down | -2.19 |
| ENSMUSG00000086679 | Gm15551       | down | -2.20 |
| ENSMUSG00000031154 | Otud5         | down | -2.20 |
| ENSMUSG00000093073 | Mir124a-2     | down | -2.21 |
| ENSMUSG00000029992 | Gfpt1         | down | -2.23 |
| ENSMUSG00000099869 | 1700030F04Rik | down | -2.26 |
| ENSMUSG00000100862 | Gm10925       | down | -2.26 |
| ENSMUSG00000045414 | 1190002N15Rik | down | -2.26 |
| ENSMUSG00000016409 | Nkap          | down | -2.26 |
| ENSMUSG00000081059 | Gm11945       | down | -2.26 |
| ENSMUSG00000006262 | Mob1b         | down | -2.27 |
| ENSMUSG00000074384 | Al429214      | down | -2.33 |
| ENSMUSG00000014470 | Rnf166        | down | -2.38 |
| ENSMUSG00000024603 | Dctn4         | down | -2.46 |
| ENSMUSG00000073481 | Marc2         | down | -2.46 |
| ENSMUSG00000109055 | Gm2676        | down | -2.50 |
| ENSMUSG00000003657 | Calb2         | down | -2.50 |
| ENSMUSG00000033152 | Podxl2        | down | -2.50 |
| ENSMUSG00000052295 | 8030423F21Rik | down | -2.50 |
| ENSMUSG00000007646 | Rad51c        | down | -2.52 |
| ENSMUSG00000118087 |               | down | -2.53 |
| ENSMUSG00000112023 | Lilr4b        | down | -2.71 |
| ENSMUSG00000005846 | Rsl1d1        | down | -2.72 |
| ENSMUSG00000042613 | Pbxip1        | down | -2.76 |
| ENSMUSG00000086238 | Gm14258       | down | -2.89 |
| ENSMUSG00000026356 | Dars          | down | -3.27 |
| ENSMUSG00000085222 | Gm13974       | down | -3.29 |
| ENSMUSG00000090381 | Gm6158        | down | -3.29 |
| ENSMUSG00000114218 | AC159195.1    | down | -3.55 |
| ENSMUSG00000035354 | Uvrag         | down | -3.58 |
| ENSMUSG00000085541 | Gm16010       | down | -3.82 |
| ENSMUSG00000048000 | Gigyf2        | down | -4.46 |

**Suppl. Table 2**

| Inguenuity Canonical Pathways             | -log(p-value) | Ratio    | z-score | Molecules                                                 |
|-------------------------------------------|---------------|----------|---------|-----------------------------------------------------------|
| <b>Upregulated pathways</b>               |               |          |         |                                                           |
| Signaling by Rho Family GTPases           | 1,82E00       | 2,87E-02 | 1,342   | ACTR2,ARPC1A,CDH20,CDH5,GNAI1,GNAT2,LIMK1                 |
| Cardiac Hypertrophy Signaling             | 9,59E-01      | 2,08E-02 | 1,000   | ADCY2,GNAI1,GNAT2,MAP3K3,MTOR                             |
| Sirtuin Signaling Pathway                 | 4,37E-01      | 1,37E-02 | 1,000   | CLOCK,GABPA,MTOR,PARP1                                    |
| Insulin Secretion Signaling Pathway       | 1,36E00       | 2,47E-02 | 0,816   | ADCY2,Arxes1/Arxes2,MTOR,NSF,SRP54,STAT5A                 |
| Estrogen Receptor Signaling               | 1,23E00       | 2,13E-02 | 0,378   | ADCY2,GNAI1,GNAT2,LIMK1,MED23,MMP8,MTOR                   |
| <b>Downregulated pathways</b>             |               |          |         |                                                           |
| Ephrin Receptor Signaling                 | 1,38E00       | 2,78E-02 | -0,447  | ACTR2,ARPC1A,GNAI1,GNAT2,LIMK1                            |
| fMLP Signaling in Neutrophils             | 1,47E00       | 3,45E-02 | -1,000  | ACTR2,ARPC1A,GNAI1,NFKBID                                 |
| Endocannabinoid Cancer Inhibition Pathway | 1,19E00       | 2,8E-02  | -1,000  | ADCY2,CASP6,GNAI1,MTOR                                    |
| RhoGDI Signaling                          | 2,52E00       | 3,89E-02 | -1,342  | ACTR2,ARPC1A,CDH20,CDH5,GNAI1,GNAT2,LIMK1                 |
| Endothelin-1 Signaling                    | 8,63E-01      | 2,13E-02 | -2,000  | ADCY2,CASP6,GNAI1,GNAT2                                   |
| Hepatic Fibrosis Signaling Pathway        | 2,65E-01      | 1,09E-02 | -2,000  | GNAI1,MTOR,NFKBID,WNT6                                    |
| <b>No change in pathways but a trend</b>  |               |          |         |                                                           |
| Synaptogenesis Signaling Pathway          | 2,74E00       | 3,21E-02 | 0,000   | ACTR2,ADCY2,ARPC1A,CDH20,CDH5,LIMK1,MTOR,NSF,STX1B,STXBP6 |
| Death Receptor Signaling                  | 1,81E00       | 4,4E-02  | 0,000   | CASP6,LIMK1,NFKBID,PARP1                                  |
| NER Pathway                               | 1,63E00       | 3,88E-02 | 0,000   | HMG1,POLD3,POLE,POLR2E                                    |
| Reelin Signaling in Neurons               | 1,32E00       | 3,1E-02  | 0,000   | ACTR2,ARPC1A,LIMK1,MTOR                                   |
| Leukocyte Extravasation Signaling         | 1,24E00       | 2,54E-02 | 0,000   | CDH5,CTNNA3,CTTN,GNAI1,MMP8                               |
| Actin Cytoskeleton Signaling              | 1,09E00       | 2,29E-02 | 0,000   | ACTR2,ARPC1A,LIMK1,NCKAP1L,TLN2                           |
| Natural Killer Cell Signaling             | 8,12E-01      | 2,03E-02 | 0,000   | LIMK1,MAP3K3,MICB,MTOR                                    |
| HIF1 $\alpha$ Signaling                   | 7,7E-01       | 1,95E-02 | 0,000   | HK2,MMP8,MTOR,NAA10                                       |
| Integrin Signaling                        | 7,28E-01      | 1,88E-02 | 0,000   | ACTR2,ARPC1A,CTTN,TLN2                                    |
| Cardiac Hypertrophy Signaling (Enhanced)  | 3,93E-01      | 1,23E-02 | 0,000   | ADCY2,GNAI1,MAP3K3,MTOR,PDE1A,WNT6                        |
| Neuroinflammation Signaling Pathway       | 0.00E+00      | 1.00E-02 | 0,000   | BIRC7,CALB2,GLUL                                          |
| Glutamine Biosynthesis I                  | 1,98E00       | 1.00E+00 | 0,000   | GLUL                                                      |
| IL-1 Signaling                            | 1,81E00       | 4,4E-02  | 0,000   | ADCY2,GNAI1,GNAT2,NFKBID                                  |
| Glutamine Degradation I                   | 1,68E00       | 5.00E-01 | 0,000   | GLS2                                                      |
